# Supplementary material
Source: publisher figshare collection journal article supplement (https://rs.figshare.com/ndownloader/files/35933425)
Supplement: Supplementary file 1 [file 35933425]

clear % 3D triangular cone diffraction vertical section xy plane
% take slit radius size r = 1
load('parameters0523.mat', 'hsi','Rs', 'Depth','Depthr', 'n','num','wl', 'Asp', 'savef', 'f'); 
w=0.5/Asp;xmax=w; % scaled as height H = 1
th1=atan(Asp*2); % incident angle
funz = @(rs) rs.*tan(th1);
% funinclang = @(rs) atan(b.*rs./(a.*sqrt(f^2-b.*rs.^2))); % for adjusting incident intensity due to incline surface
% cosfactor = @(y,x,yc,xc) sqrt(1-(x-xc).^2./((x-xc).^2+(y-yc).^2));
funR = @(rs, phs, Xscr,L,hsi) sqrt((hsi-funz(rs)+L).^2+(rs.*cos(phs)-Xscr).^2+(rs.*sin(phs)).^2);
funth = @(rs, phs, Xscr,L,hsi) atan(sqrt((rs.*cos(phs)-Xscr).^2+(rs.*sin(phs)).^2)./(hsi-funz(rs)+L));
funphase = @(rs,phs,Xscr,wl,L,phase,hsi) rs.*(cos((2*pi./wl).*funz(rs)+(2*pi./wl).*n.*funR(rs, phs, Xscr, L,hsi)+phase)+1i*sin((2*pi./wl).*funz(rs)+(2*pi./wl).*n.*funR(rs, phs, Xscr, L,hsi)+phase)).*cos(0.5*funth(rs, phs, Xscr, L,hsi))./funR(rs, phs, Xscr,L,hsi);  % .*cos(0.5*funth(rs, phs, Xscr, L)).*sqrt(cos(funinclang(rs))) point source 2D integration
positionx=zeros(1,101);positiony=zeros(1,101);Int=zeros(1,101);
for m=1:101
    radius=(m-51)*xmax/50;positionx(m)=radius;
    positiony(m)=1-abs(funz(radius));
end
% hold on;
figure(1); plot(positionx,positiony);
for mm=1:num
    wl=wls(mm);wln=round(wl*1000);wlns=num2str(wln);
    savefile = ['data04/tri/trixzwl',wlns, savef, '.dat'];
for j=1:101
    L=(j-1)*Depthr/100+Depth;
    for i=1:101
        Xs=(i-51)*Rs/50;
        phase=0; %-(2*pi/wl)*n*(1+L);
        amp=integral2 (@(rs, phs) funphase(rs,phs,Xs,wl,L,phase),0,xmax,-pi,pi,'method','iterated','RelTol',1e-6,'AbsTol',0); %*cos(theda); % integration
        Int(i)=abs(amp)^2;positiony(i)=(1+L);positionx(i)=Xs;
    end
    data=[positionx', positiony',Int'];
    if j==1
        save(savefile, 'data','-ascii','-tabs');
    else
        save(savefile, 'data','-ascii','-tabs','-append');
    end
end
end
